# Supplementary material
Source: publisher site journal article supplement (https://www.degruyterbrill.com/publication/journal_key/JNGE/downloadAsset/JNGE_Manusctipt%20Template.docx)
Supplement: Supplementary file 1 [file JNGE_Manusctipt%20Template.docx]

**TITLE OF THE PAPER**

(title should be informative, specific, and up to 75 characters, including spaces)

**Running title of the paper**

(short version of the title; up to 50 characters, including spaces)

**Abstract:** Text of the abstract (up to 200 words; should be understandable without reference to the text – please do not use citations and references, avoid specialist abbreviations and symbols)

**Keywords:** keyword1, keyword2, keyword3… (up to 10 keywords separated by commas)

(details about authors, their affiliations and addresses should be included in the cover letter, not in the manuscript text – for more information visit: <https://www.degruyter.com/view/supplement/s23915447_Instruction_for_Authors.pdf>, pages 2 and 4)

**Introduction**

Text text text text text text [1]. Text text text text text text text text text text [2,3]. Text text text text text text text (see Fig. 1). Text text text text text text text text text [4-8], text text text text text. Text text text text text text text… (details about references: see below)

<Location of Figure 1> (locations of figures and tables should be clearly indicated in the text)

**Methods**

Text text text text text text text [9], text text text text text [10]. Text text text text text text text text text text text text text text [11,12]. Text text text text text text text text text text text [13-15]. Text text text text text text text text… (details about references: see below)

**Results**

Text text text text text text text text text in Fig. 2. Text text text text text text [16]. Text text text text text text tex (see Table 1). Text text text text text text text [17]. Text text text text text text text text… (details about references: see below)

**Discussion**

Text text text text text text text [18-22]. Text text text text in Table 2. Text text text text text text text text text [23], text text text text text [24,25]. Text text text text text text text text text text [26]. Text text text text text (details about references: see below)

**Acknowledgements**

Text about funding sources…

Text about the contribution of other people to the work… (this information about personal contribution should be presented in a separate paragraph)

**References**

[1] Surname1 Initial1., Surname2 Initial2, Publication title. Journal title (presented using abbreviations), year of publication, volume number (issue number), pages, doi: XX.XXX/xxxxxxxxxx (this is an example for electronic journal articles; reference style for other types of publications are presented below)

[2] Bartoszek K., Skiba D., Circulation types classification for hourly precipitation events in Lublin (East Poland). Open Geosci., 2016, 8 (1), 214-230, doi: 10.1515/geo-2016-0019 (this is an example of an electronic journal article reference)

[3]

[4]

[5]

[6]… (references should be listed and numbered in the order that they appear in the text)

**Figure legends and table captions**

Figure 1: Figure legend

Figure 2: Figure legend

Table 1: Table caption

Table 2: Table caption

- figures and tables should be numbered consecutively using Arabic numerals and referred to in the text by number, e.g. “in Fig. 1” or “(see Fig. 1)”; “in Table 1” or “(see Table 1)”.
- for details about figures and tables visit: <https://www.degruyter.com/view/supplement/s23915447_Instruction_for_Authors.pdf> (page 9)

**Tables** (each table on a separate page)

**Figures** (each figure on a separate page)

**Supplemental data** (if applicable)

**GENERAL RULES**

- text files allowed: MS Word (.DOC, .DOCX or .RTF), PDF (not applicable for re-submitted or accepted manuscripts),
- articles prepared in LaTeX will be accepted in review, but only in PDF format,
- graphic files allowed: EPS, BMP, JPG, TIFF, GIF, PDF,
- tables should be submitted as MS Word or PDF (straight Excel format is not acceptable),
- pages must be numbered consecutively,
- text should be formatted double-spaced (including legends, references),
- hyphenation, automatic word-wrap and hard returns within paragraphs are not allowed,
- font size should be no smaller than 12,
- footnotes and endnotes should be avoided (exceptions: visit <https://www.degruyter.com/view/supplement/s23915447_Instruction_for_Authors.pdf>, page 11),
- do not create symbols as graphics or do not use special fonts that are external to your word processing program,
- for further details visit: <https://www.degruyter.com/view/supplement/s23915447_Instruction_for_Authors.pdf>.

**REFERENCE RULES**

**General rules about citations in the manuscript text:**

- References to unpublished or submitted works, unpublished conference presentations, personal communications, patent applications and patents pending, computer software, databases should be referred to as such only in the body of the text (in round brackets) and should be kept to a minimum. Examples:
  - - (J. Smith, unpublished data),
    - (J. Smith and P. Brown, submitted for publication),
    - (J. Smith, personal communication),
    - (J. Smith and P. Brown, presented at the 4th Symposium on Speleology, Overton, IL, 13-15 June 1989),
    - (J. C. Odell, April 1970, Process for batch culturing, U.S. patent 484,363,770).
- References to published or accepted (“in press”) manuscripts, articles, book chapters, books and meeting abstracts should follow the rules presented below:
  - - they should be numbered in the order that they appear in the text,
    - citation numbers should appear in square brackets: [1],
    - multiple citations within a single set of brackets should be separated by commas: [1,2] or [1,2,6],
    - three or more sequential citations should be presented as a range: [7-9] or [12-18],
    - references in figure captions and tables should be listed after references in the text.

**General rules about references in the Reference list:**

- please follow the style presented above (References [1] and [2]) and below (Examples of references),
- all six first authors should be listed (Pong A., Gold C., Rock B., Wayne J., Jin X., Fox A.),
- in case of seven or more authors please use “et al.” after the sixth author (..., Fox A. et al.),
- in case of authors with two (or more) initials please write all of them without spaces between the initials (e.g. Silver C.G., Oliveira J.C.A., van Damme J.-C.)
- journal titles should be presented using their abbreviations (e.g. Int. J. Climatol.); the list of abbreviations following the ISI standards can be found on: <https://www.library.caltech.edu/journal-title-abbreviations>,
- please do not use full stops or commas at the end of each reference.

**EXAMPLES OF REFERENCES FOR VARIOUS TYPES OF PUBLICATIONS**

Published papers in English:

[7] Hunsche U., Hampel A., Rock salt – the mechanical properties of the host rock material for radioactive waste respiratory. Eng. Geol., 1999, 52, 271-291

Published papers in other languages:

[8] Bezák V., Lexa J., Genetické typy ryolitových vulkanoklastík v okolí Žiaru nad Hronom [Genetic types of rhyolite volcaniclastic rocks in the surroundings of Žiar nad Hronom], Geologicke Prace, Spravy, 1982, 79, 83-112 (in Slovak with English summary)

Accepted papers:

[9] Sippel J., Scheck-Wenderoth M., Reicherter K., Mazur S., Palaeostress states at the south-western margin of the Central European Basin System – application of fault-slip analysis to unravel a polyphase deformation pattern. Tectonophysics (in press), doi: 10.1016/j.tecto.2008.04.010

Published electronic journal articles:

[10] García-Castellanos D., Vergés J., Gaspar-Escribano J., Cloetingh S., Interplay between tectonics, climate and fluvial transport during the Cenozoic evolution of the Ebro Basin (NE Iberia): from endorheic infill to exorheic erosion. J. Geophys. Res., 2003, 108 (B7), doi: 10.1029/2002JB002073

Books and book chapters:

[11] Landau K.R., Lifshitz E.M., Theory of Elasticity. Pergamon Press, Oxford, 1986

[12] Kowallis B.J., Christiansen E.H., Blatter T.K., Keith J.D., Tertiary paleostress variation in time and space near the eastern margin of the Basin/Range province, Utah. In: Rossmanith H.P (Ed.), Mechanics of Jointed and Faulted Rock. Balkema, Rotterdam, 1995, 297-302

Theses:

[13] Brouard B., On the behavior of solution-mined caverns. PhD thesis, Ecole Polytechnique, France, 1988 (in French)

Conference proceedings (in a conference book):

[14] Fülöp A., Kovacs M., Pannonian acid volcanism in Gutâi Mts. (East Carpathians, Romania): volcanological features, magmatological and tectonical Significance. In: Popov P. (Ed.), Plate tectonic aspects of the alpine metallogeny in the Carpatho-Balkan region. Proceedings of the annual meeting UNESCO-IGCP Project 356, Sofia, 1996, 57-67

Newspaper articles:

[15] Kluger J., Global warming heats up. Time Magazine, 26 March 2006, 1-7

Maps:

[16] Budai T., Csillag G., Dudko A., Koloszár L., Geological map of the Balaton Highland (1:50 000). Magyar Állami Földtani Intézet, Budapest, Hungary, 1999

[17] Neall V.E., Sheets P19, P20 and P21 – New Plymouth, Egmont and Manaia. Geological Map of New Zealand (1:50 000). Department of Scientific and Industrial Research, Wellington, New Zealand, 1979

Reports:

[18] Player, R.A. Salt Plugs Study. Iranian Oil Operating Companies, Geological and Exploration Division, Tehran, Report No. 1146, 1969

Websites:

[19] PCC Fourth Assessment Report: Climate Change, 2007 <http://www.ipcc.ch/publications_and_data/ar4/wg1/en/contents.html>
